# Supplementary material
Source: Springer Nature journal article supplement (https://www.springermedizin.de/resource/supplementary/13030_2012_133_MOESM3_ESM.pdf/9644808)

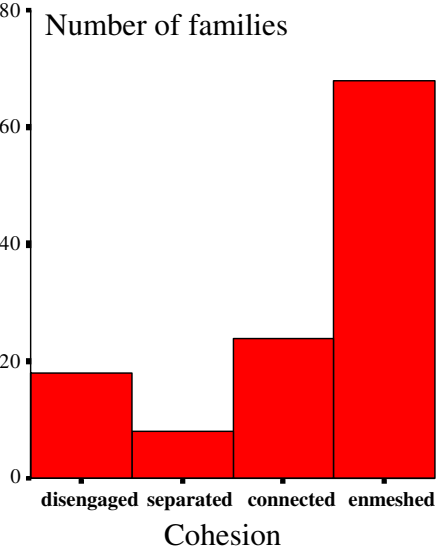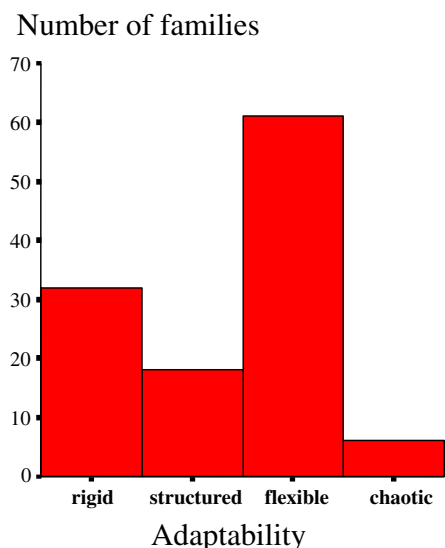

Supplement: MOESM3 [file 9644808]
